# Supplementary material for: Cell-to-cell lactate shuttle operates in heart and is important in age-related heart failure
Source: publisher site journal article supplement (doi:10.18632/aging.102818), 2020-02-08
Supplement: Supplementary file [file aging-v12i4-102818-supplementary-material-SD1.pdf]

SUPPLEMENTARY FIGURE

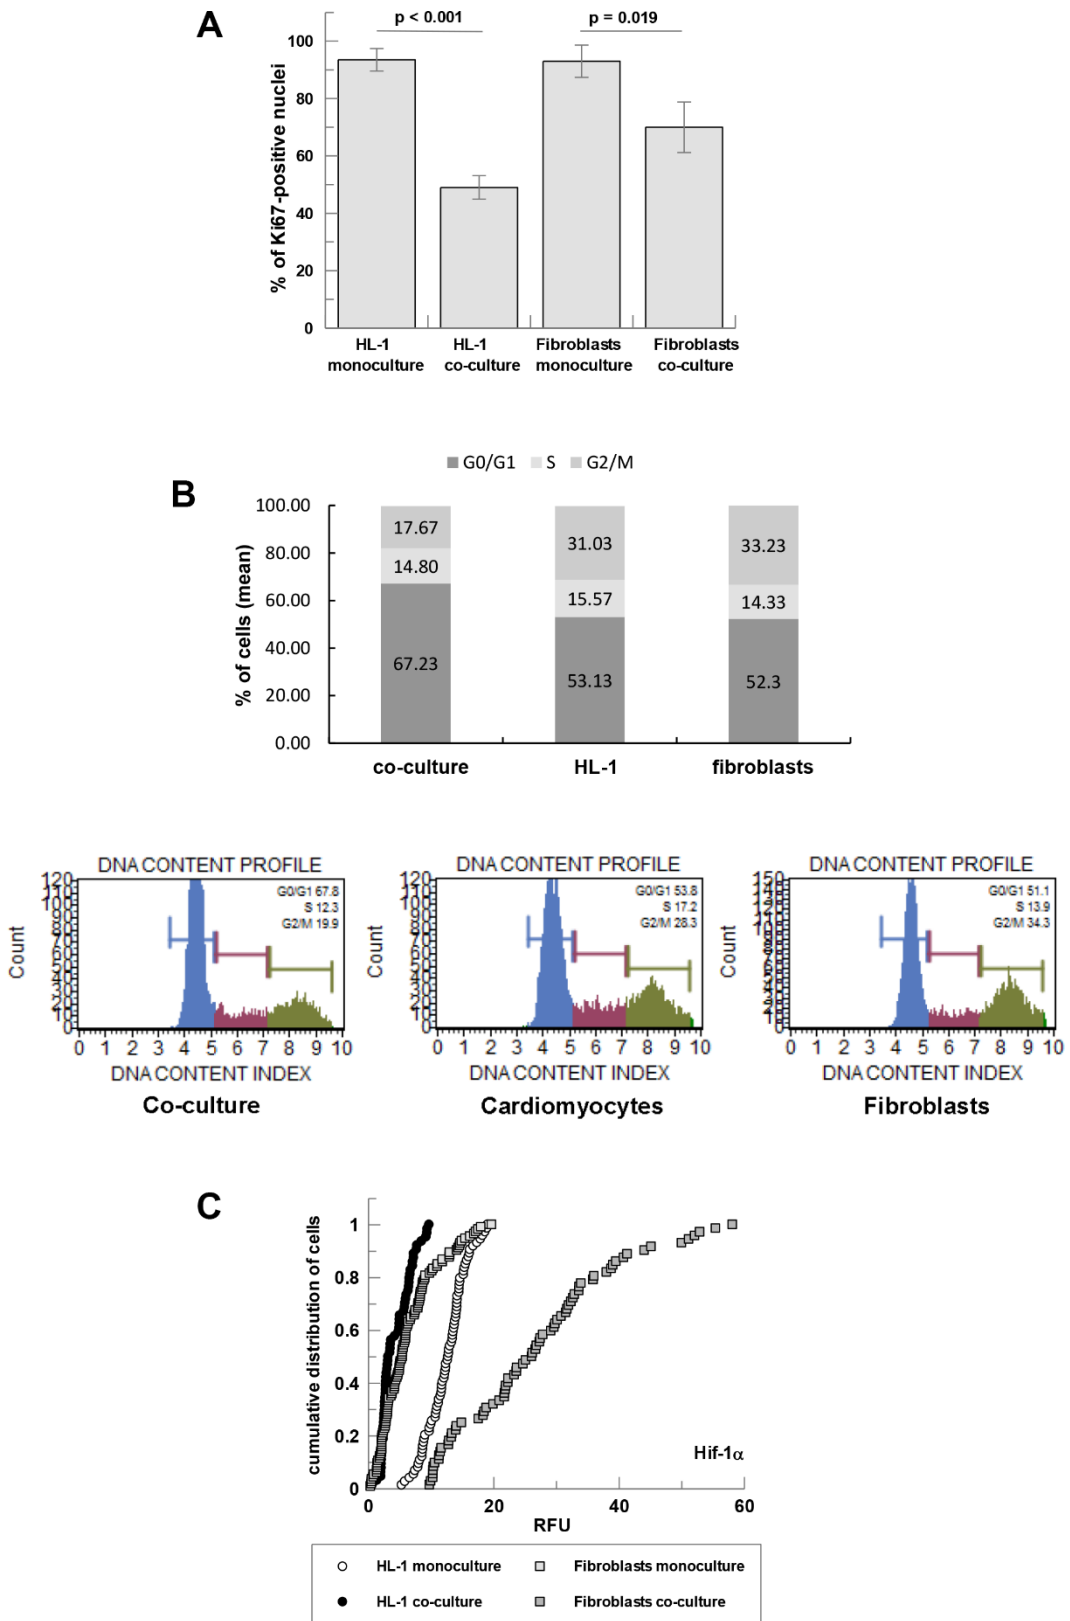

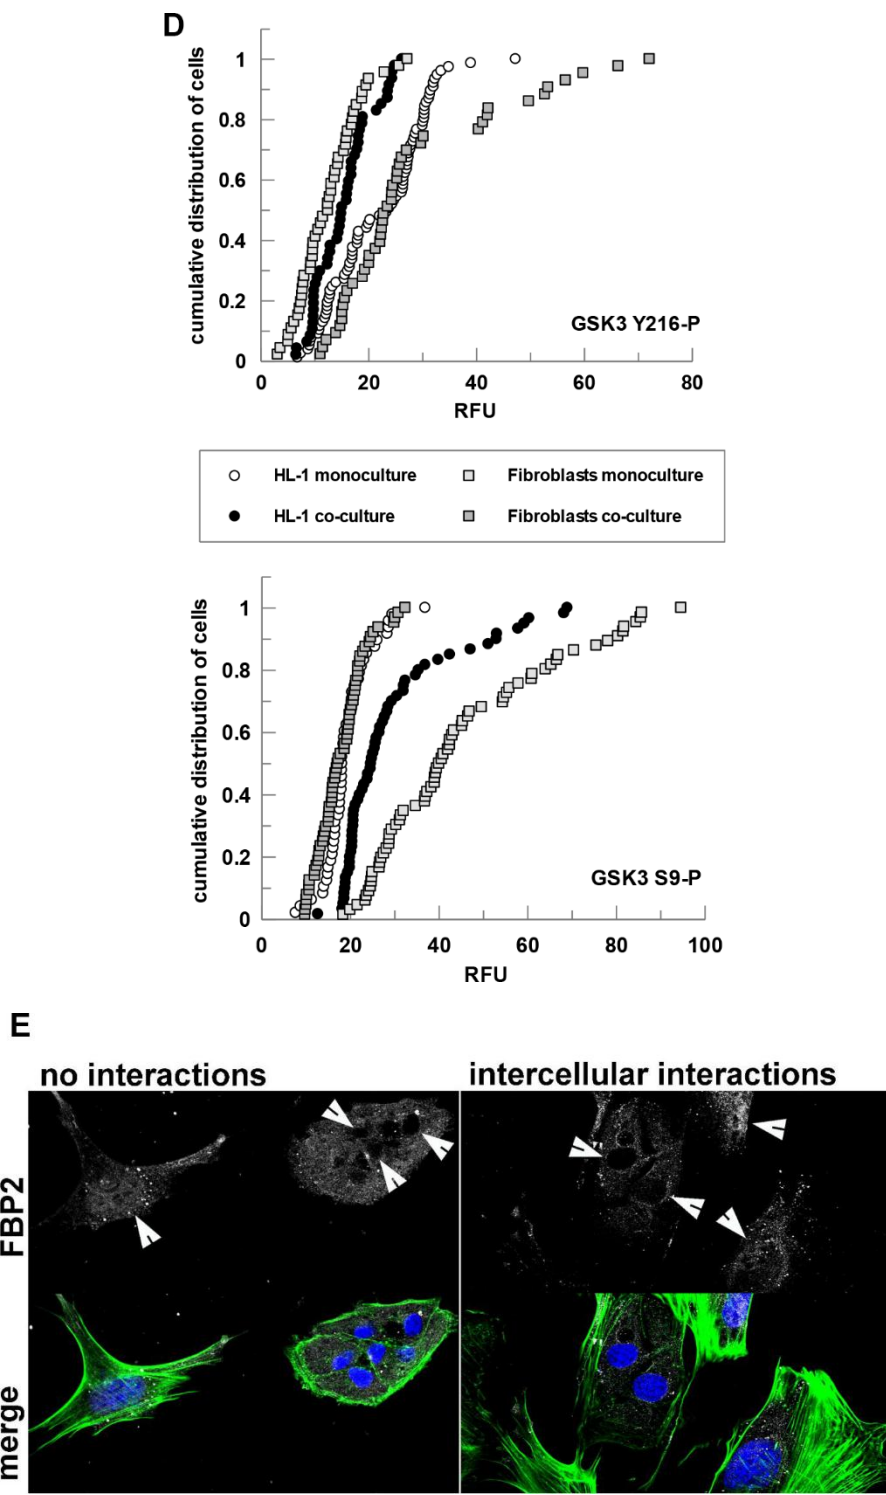

**Supplementary Figure 1. Changes in protein localization/expression and cell cycle progression induced by co-culture of cardiomyocytes and fibroblasts.** (A) Number of Ki67-positive nuclei in cardiomyocytes and fibroblasts, in mono- and co-cultures. The results are expressed as mean and standard deviation. For an evaluation of statistical significance, the Student's t-test was used. (B) Cell cycle progression in the co-culture of cardiomyocytes and fibroblasts compared to the monocultures. The graph presents mean percentage (from 3 independent experiments) of the cells in a given phase of the cell cycle. Representative histograms from one experiment are also shown. (C) Changes in Hif-1 $\alpha$ -related fluorescence in fibroblasts cultured alone and with HL-1 cells. The percentage frequency ("cumulative distribution") plot was created with GraFit program. For statistical analysis the two sample Kolmogorov–Smirnov test was used. RFU – Relative Fluorescence Units. A noticeable increase of anti-HIF-1 $\alpha$  staining was observed in nuclei fibroblasts co-cultured with HL-1 cells, as compared monoculture ( $D=0.81$ ,  $p<0.001$ ). In HL-1 cells, co-culturing with fibroblasts induced decrease of HIF-1 $\alpha$ -related fluorescence in nuclei ( $D=0.85$ ,

$p < 0.001$ ). (D) Changes in fluorescence of the active (Y216-P) and inactive (S9-9) form of GSK3 in nuclei cells, in mono- and co-cultures. The percentage frequency (“cumulative distribution”) plot was created with GraFit program. For statistical analysis the two sample Kolmogorov–Smirnov test was used. RFU – Relative Fluorescence Units. A decrease of Y216-P ( $D=0.45$ ,  $p < 0.001$ ) and increase of S9-P ( $D=0.53$ ,  $p < 0.001$ ) was observed in cardiomyocytic nuclei in co-cultures, compared to monocultures. In turn, in the fibroblasts’ nuclei, the amount of Y216-P increased ( $D=0.64$ ,  $p < 0.001$ ) and S9-P decreased ( $D=0.8$ ,  $p < 0.001$ ) in co-cultures. (E) Changes in the studied proteins localization/expression were independent on physical contacts between the two cell types. During the course of the study we tested different densities of HL-1–fibroblasts co-cultures and obtained the same results. Below, FBP2 (white) disappears from HL-1 cells nuclei and accumulates in nuclei of fibroblasts in the co-cultures, regardless of intercellular contacts. Actin is counterstained green (phalloidin-Alexa 488), nuclei – blue (DAPI). Arrows point to some nuclei.
