# Supplementary material for: Cell-to-cell lactate shuttle operates in heart and is important in age-related heart failure
Source: publisher site journal article supplement (doi:10.18632/aging.102818), 2020-02-08
Supplement: Supplementary file [file aging-v12i4-102818-supplementary-material-SD2.pdf]

## SUPPLEMENTARY TABLE

**Supplementary Table 1. The list of antibodies used in the experiments.**

| Antigen                                                 | Animal host | Catalog number | Vendor/Reference  | Dilution |
|---------------------------------------------------------|-------------|----------------|-------------------|----------|
| <b>Primary antibodies</b>                               |             |                |                   |          |
| Fructose 1,6-bisphosphatase (FBP)                       | rabbit      | -              | [1]               | 1:800    |
| C-terminal peptide of phosphoglucosmutase 2 (PGAM2)     | goat        | NB100-774      | Novus Biologicals | 1:1000   |
| Aldolase A                                              | rabbit      | -              | [2]               | 1:300    |
| Hexokinase 2                                            | rabbit      | AB3279         | Sigma-Aldrich     | 1:400    |
| Glycogen synthase kinase-3 beta (GSK3, total protein)   | mouse       | 610201         | BD Biosciences    | 1:300    |
| GSK3 phospho-Ser9                                       | rabbit      | 04-1075        | Merck             | 1:250    |
| GSK3 phospho-Tyr216                                     | mouse       | 612612         | BD Biosciences    | 1:150    |
| Hypoxia-inducible factor 1-alpha (HIF-1 alpha)          | rabbit      | bs-0737R       | Bioss             | 1:500    |
| Proliferation marker protein Ki67                       | rabbit      | 301107         | Novocastra        | 1:100    |
| Phosphofructokinase muscle form (PFKM)                  | rabbit      | HPA002117      | Atlas Antibodies  | 1:200    |
| Pyruvate kinase muscle form (PKM)                       | goat        | R1108          | Acris             | 1:400    |
| Lactate dehydrogenase A (LDHA)                          | rabbit      | NBP1-48336     | Novus Biologicals | 1:200    |
| Lactate dehydrogenase B (LDHB)                          | rabbit      | ab75167        | Abcam             | 1:400    |
| Monocarboxylate transporter 1 MCT1 (SLC16A1)            | mouse       | ab90582        | Abcam             | 1:100    |
| Monocarboxylate transporter 2 MCT2 (SLC16A7)            | rabbit      | bs-3995R       | Bioss             | 1:100    |
| Monocarboxylate transporter 4 MCT4 (SLC16A3)            | rabbit      | HPA021451      | Atlas Antibodies  | 1:50     |
| TP53-induced glycolysis and apoptosis regulator (TIGAR) | rabbit      | PRS4051        | Sigma-Aldrich     | 1:400    |
| Glucose transporter 1 (GLUT1)                           | mouse       | ab40084        | Abcam             | 1:50     |
| <b>Secondary antibodies</b>                             |             |                |                   |          |
| anti-rabbit Alexa 633-conjugated                        | goat        | A21070         | ThermoFisher      | 1:400    |
| anti-goat FITC-conjugated                               | rabbit      | F9012          | Sigma-Aldrich     | 1:200    |
| anti-mouse TRITC-conjugated                             | goat        | T6528          | Sigma-Aldrich     | 1:200    |

- Gizak A, Dzugaj A. FBPase is in the nuclei of cardiomyocytes. *FEBS Lett.* 2003; 539:51–5. [https://doi.org/10.1016/s0014-5793\(03\)00183-2](https://doi.org/10.1016/s0014-5793(03)00183-2); PMID: [12650925](https://pubmed.ncbi.nlm.nih.gov/12650925/)
- Mamczur P, Dzugaj A. Nuclear localization of aldolase A in pig cardiomyocytes. *Histol Histopathol.* 2004; 19:753–8. <https://doi.org/10.14670/HH-19.753>. PMID: [15168337](https://pubmed.ncbi.nlm.nih.gov/15168337/)
